# Supplementary material for: Is the Invasiveness of Pittosporum undulatum in Eucalypt Forests Explained by the Wide Ranging Effects of Its Secondary Metabolites?
Source: MDPI journal article supplement (doi:10.3390/f14010039), 2022-12-25
Supplement: s1 [file s1]

Archive with 1 entries (1 files):
- forests-2102733-supplementary.pdf
