# Supplementary material for: Is the Invasiveness of Pittosporum undulatum in Eucalypt Forests Explained by the Wide Ranging Effects of Its Secondary Metabolites?
Source: MDPI journal article supplement (doi:10.3390/f14010039), 2022-12-25
Supplement: s1 [file s1 › forests-2102733-supplementary.pdf]

## **Supplementary Material**

**Supplementary Figures and Tables**

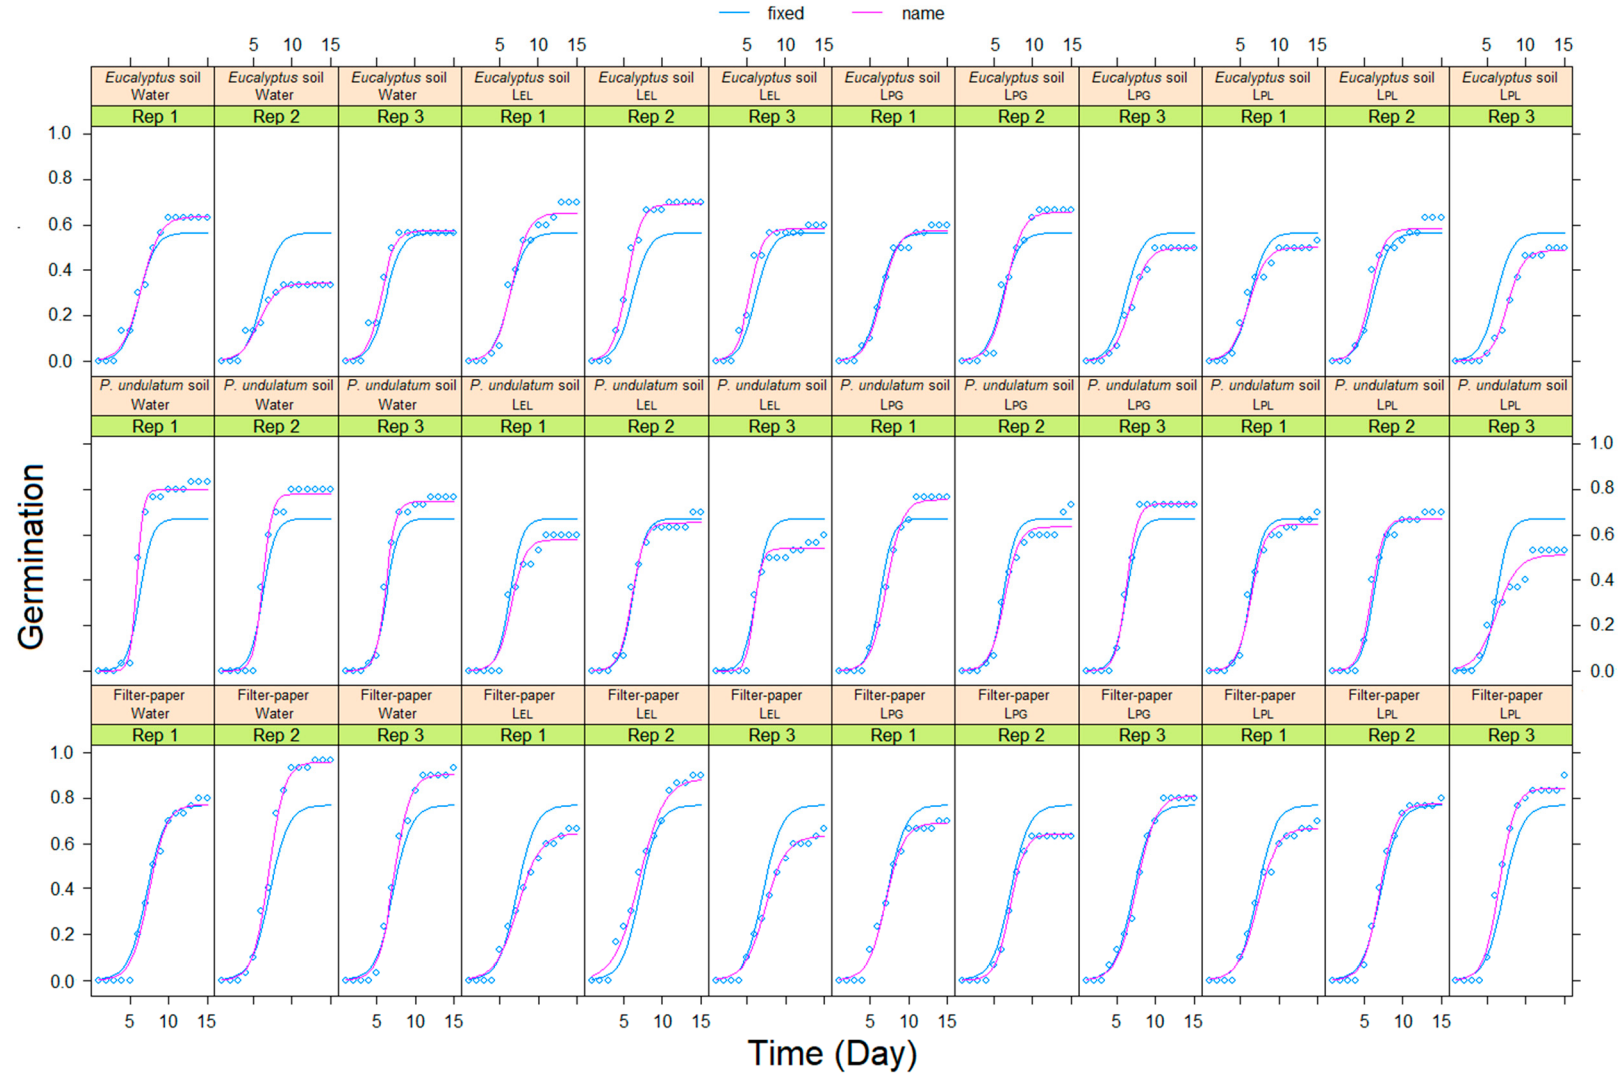

**Figure S1.** Temporal progression of seeds germination for each Petri dish ( $n=36$ ) for *Eucalyptus ovata* seeds: all combinations (substrate  $\times$  watering treatment) and all replicates (Rep 1-3) are reported. On the x axis the days of interest are reported (from 17<sup>th</sup> to 22<sup>th</sup> day no germination was present, thus this time was removed from the figure to allow for a better visualisation). In each plot, the blue dots represent the daily cumulate counts of germinated seeds. The pink S-shape curves are unique for each dish and they are obtained from the equation  $y = GP / (1 + \exp[-(\text{day} - t_{50}) / t_{75}])$ . The fitted S-shape curves represent the mean of the three replicates for every combination substrate  $\times$  watering treatments and are displayed as blue S-shape curves.

**Table S1.** Summary of Nonlinear Mixed-Effects Models for *Eucalyptus ovata* seeds reported in Table 1. The fixed part of the model was ' $(GP + t_{50} + t_{75} \sim \text{substrate})$ ' and Filter-paper substrate was selected as floor treatment against which *P. undulatum* soil substrate and *Eucalyptus* soil substrate were compared. The table is divided based on the different reference parameters (Intercepts). A) **GP** a numeric parameter representing the horizontal asymptote; B) **t<sub>50</sub>** a numeric parameter representing the day of the inflection point of the curve; C) **t<sub>75</sub>** a numeric scale parameter representing the distance between t<sub>50</sub> and  $\frac{3}{4}$  of GP. All results are considered significant when  $p < 0.05$  ( $ns > 0.05$ , \*  $0.01 < p < 0.05$ , \*\*  $0.001 < p < 0.01$ , \*\*\*  $p < 0.001$ ).

|    |                                                | Value | Std.Error | DF  | t-value | p-value |
|----|------------------------------------------------|-------|-----------|-----|---------|---------|
| A) | <b>GP(Intercept)</b> _Filter-paper             | 0.77  | 0.029     | 496 | 26.45   | <0.0001 |
|    | <b>GP</b> _P.undulatum_soil                    | -0.10 | 0.041     | 496 | -2.40   | 0.0168  |
|    | <b>GP</b> _Eucalyptus_soil                     | -0.20 | 0.041     | 496 | -4.96   | <0.0001 |
| B) | <b>t<sub>50</sub>(Intercept)</b> _Filter-paper | 7.18  | 0.137     | 496 | 52.47   | <0.0001 |
|    | <b>t<sub>50</sub></b> _P.undulatum_soil        | -0.92 | 0.192     | 496 | -4.78   | <0.0001 |
|    | <b>t<sub>50</sub></b> _Eucalyptus_soil         | -0.99 | 0.196     | 496 | -5.06   | <0.0001 |
| C) | <b>t<sub>75</sub>(Intercept)</b> _Filter-paper | 1.19  | 0.071     | 496 | 16.67   | <0.0001 |
|    | <b>t<sub>75</sub></b> _P.undulatum_soil        | -0.38 | 0.100     | 496 | -3.85   | 0.0001  |
|    | <b>t<sub>75</sub></b> _Eucalyptus_soil         | -0.15 | 0.104     | 496 | -1.41   | 0.1604  |

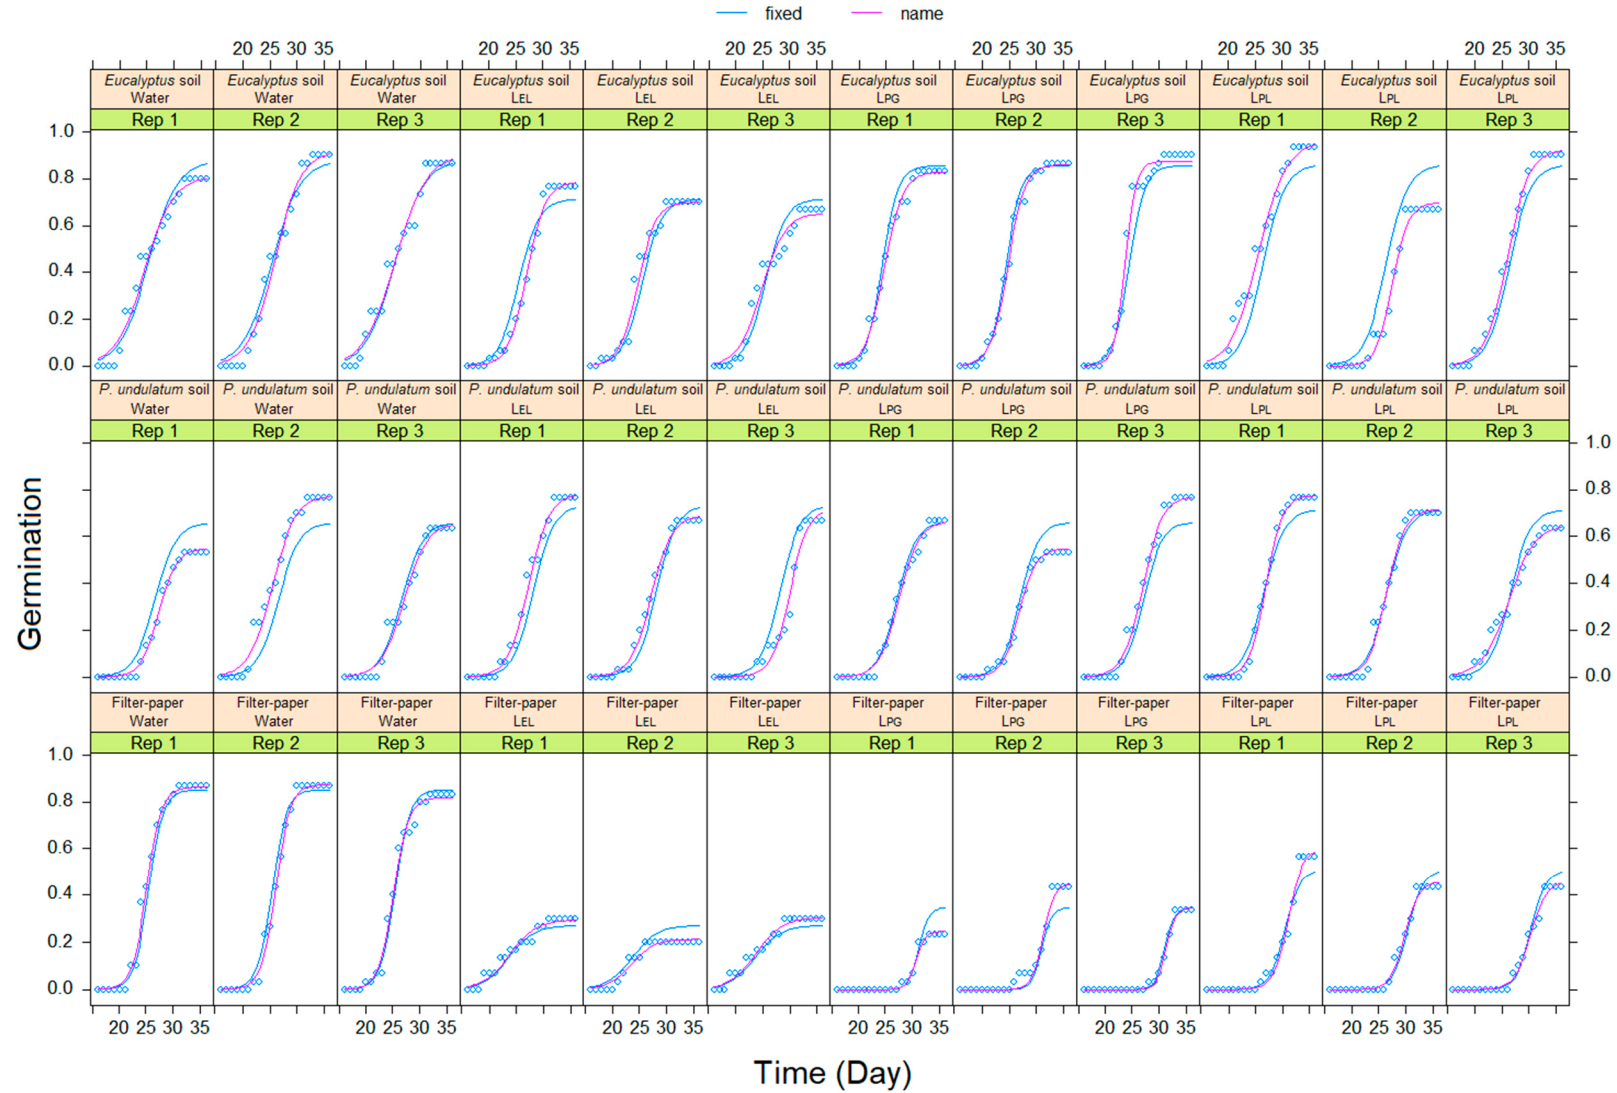

**Figure S2.** Temporal progression of seeds germination for each Petri dish ( $n=36$ ) for *Pittosporum undulatum* seeds: all combinations (*substrate*  $\times$  *watering treatment*) and all replicates (Rep 1-3) are reported. On the x axis the days of interest are reported (from 15<sup>th</sup> to 38<sup>th</sup> day – the first two weeks were removed since the first germination occurred at day 15). In each plot, the blue dots represent the daily cumulate counts of germinated seeds. The pink S-shape curves are unique for each dish and they are obtained from the equation  $y = GP / (1 + \exp[-(day - t_{50}) / t_{75}])$ . The fitted S-shape curves represent the mean of the three replicates for every combination substrate  $\times$  watering treatment and are displayed as blue S-shape curves.

**Table S2.** Summary of Nonlinear Mixed-Effects Models for *Pittosporum undulatum* seeds reported in Table 2. The fixed part of the model was '(GP +  $t_{50}$  +  $t_{75}$  ~ substrate  $\times$  treatment)' and Filter-paper Water was selected as floor treatment against which all other combinations were compared. The table is divided based on the different reference parameters (Intercepts). A) **GP** a numeric parameter representing the horizontal asymptote; B)  **$t_{50}$**  a numeric parameter representing the day of the inflection point of the curve; C)  **$t_{75}$**  a numeric scale parameter representing the distance between  $t_{50}$  and  $\frac{3}{4}$  of GP. All results are considered significant when  $p < 0.05$  (*ns* > 0.05, \* 0.01 <  $p < 0.05$ , \*\* 0.001 <  $p < 0.01$ , \*\*\*  $p < 0.001$ ).

|    |                                          | Value | Std.Error | DF  | t-value | p-value |
|----|------------------------------------------|-------|-----------|-----|---------|---------|
| A) | <b>GP(Intercept)</b> _Filter-paper_Water | 0.85  | 0.041     | 685 | 20.68   | <0.0001 |
|    | <b>GP</b> _P.undulatum_soil_Water        | -0.19 | 0.059     | 685 | -3.27   | 0.0011  |
|    | <b>GP</b> _Eucalyptus_soil_Water         | 0.03  | 0.059     | 685 | 0.44    | 0.6622  |
|    | <b>GP</b> _Filter-paper_LEL              | -0.58 | 0.058     | 685 | -9.94   | <0.0001 |
|    | <b>GP</b> _P.undulatum_soil_LEL          | 0.65  | 0.084     | 685 | 7.83    | <0.0001 |
|    | <b>GP</b> _Eucalyptus_soil_LEL           | 0.41  | 0.083     | 685 | 5.01    | <0.0001 |
|    | <b>GP</b> _Filter-paper_LPG              | -0.50 | 0.059     | 685 | -8.56   | <0.0001 |
|    | <b>GP</b> _P.undulatum_soil_LPG          | 0.50  | 0.084     | 685 | 6.08    | <0.0001 |
|    | <b>GP</b> _Eucalyptus_soil_LPG           | 0.48  | 0.083     | 685 | 5.80    | <0.0001 |
|    | <b>GP</b> _Filter-paper_LPL              | -0.34 | 0.060     | 685 | -5.79   | <0.0001 |
|    | <b>GP</b> _P.undulatum_soil_LPL          | 0.39  | 0.084     | 685 | 4.77    | <0.0001 |
|    | <b>GP</b> _Eucalyptus_soil_LPL           | 0.32  | 0.084     | 685 | 3.90    | 0.0001  |

**Table S2.** (continued)

|    |                                           | <i>Value</i> | <i>Std.Error</i> | <i>DF</i> | <i>t-value</i> | <i>p-value</i> |
|----|-------------------------------------------|--------------|------------------|-----------|----------------|----------------|
| B) | <b>t50(Intercept)</b> _Filter-paper_Water | 25.36        | 0.430            | 685       | 58.94          | <0.0001        |
|    | <b>t50</b> _P.undulatum_soil_Water        | 1.14         | 0.619            | 685       | 1.85           | 0.0647         |
|    | <b>t50</b> _Eucalyptus_soil_Water         | -0.08        | 0.618            | 685       | -0.14          | 0.8880         |
|    | <b>t50</b> _Filter-paper_LEL              | -1.74        | 0.695            | 685       | -2.50          | 0.0127         |
|    | <b>t50</b> _P.undulatum_soil_LEL          | 3.37         | 0.936            | 685       | 3.60           | 0.0003         |
|    | <b>t50</b> _Eucalyptus_soil_LEL           | 1.89         | 0.934            | 685       | 2.03           | 0.0429         |
|    | <b>t50</b> _Filter-paper_LPG              | 5.64         | 0.627            | 685       | 8.99           | <0.0001        |
|    | <b>t50</b> _P.undulatum_soil_LPG          | -5.1         | 0.886            | 685       | -5.75          | <0.0001        |
|    | <b>t50</b> _Eucalyptus_soil_LPG           | -6.57        | 0.881            | 685       | -7.46          | <0.0001        |
|    | <b>t50</b> _Filter-paper_LPL              | 5.01         | 0.626            | 685       | 8.00           | <0.0001        |
|    | <b>t50</b> _P.undulatum_soil_LPL          | -5.01        | 0.886            | 685       | -5.66          | <0.0001        |
|    | <b>t50</b> _Eucalyptus_soil_LPL           | -3.95        | 0.883            | 685       | -4.47          | <0.0001        |

**Table S2.** (continued)

|    |                                           | <i>Value</i> | <i>Std.Error</i> | <i>DF</i> | <i>t-value</i> | <i>p-value</i> |
|----|-------------------------------------------|--------------|------------------|-----------|----------------|----------------|
| C) | <b>t75(Intercept)</b> _Filter-paper_Water | 1.37         | 0.172            | 685       | 7.95           | <0.0001        |
|    | <b>t75</b> _P.undulatum_soil_Water        | 0.59         | 0.259            | 685       | 2.28           | 0.0228         |
|    | <b>t75</b> _Eucalyptus_soil_Water         | 1.28         | 0.257            | 685       | 4.97           | <0.0001        |
|    | <b>t75</b> _Filter-paper_LEL              | 1.00         | 0.371            | 685       | 2.66           | 0.0079         |
|    | <b>t75</b> _P.undulatum_soil_LEL          | -1.10        | 0.459            | 685       | -2.40          | 0.0167         |
|    | <b>t75</b> _Eucalyptus_soil_LEL           | -1.79        | 0.457            | 685       | -3.92          | 0.0001         |
|    | <b>t75</b> _Filter-paper_LPG              | -0.45        | 0.272            | 685       | -1.66          | 0.0982         |
|    | <b>t75</b> _P.undulatum_soil_LPG          | 0.24         | 0.384            | 685       | 0.62           | 0.5382         |
|    | <b>t75</b> _Eucalyptus_soil_LPG           | -0.74        | 0.375            | 685       | -1.99          | 0.0474         |
|    | <b>t75</b> _Filter-paper_LPL              | 0.03         | 0.268            | 685       | 0.12           | 0.9056         |
|    | <b>t75</b> _P.undulatum_soil_LPL          | -0.11        | 0.380            | 685       | -0.28          | 0.7775         |
|    | <b>t75</b> _Eucalyptus_soil_LPL           | -0.66        | 0.375            | 685       | -1.77          | 0.0771         |

**Table S3.** Summary of Generalized Linear Models for the time for the first germination ( $t_0$ , day) of *Eucalyptus ovata* seedlings under different substrates (*i.e.*, Filter-paper; *P. undulatum* soil; *Eucalyptus* soil) and different watering treatments (*i.e.*, Water; L<sub>EL</sub> = Leachate of *Eucalyptus* spp. Litter; L<sub>PG</sub> = Leachate of *P. undulatum* Green leaves; L<sub>PL</sub> = Leachate of *P. undulatum* Litter). The formula of the model equation is *glm* ( $t_0 \sim \text{Substrate} \times \text{Treatment}$ , *family* = *poisson* (*link* = "log")), the intercept is Filter-paper Water, and the significance is calculated on the exponent and not on the  $t_0$ . All results with  $p < 0.05$  were considered significant.

| Substrate                | Watering<br>treatment | <i>Estimate</i> | <i>Std.Error</i> | <i>z value</i> | <i>Pr(&gt; z )</i> |
|--------------------------|-----------------------|-----------------|------------------|----------------|--------------------|
| Filter-paper             | Water                 | 1.6090          | 0.2582           | 6.233          | <0.001             |
| <i>P. undulatum</i> soil | Water                 | -0.0690         | 0.3716           | -0.186         | 0.853              |
| <i>Eucalyptus</i> soil   | Water                 | -0.2231         | 0.3873           | -0.576         | 0.565              |
| Filter-paper             | L <sub>EL</sub>       | -0.0690         | 0.3716           | -0.186         | 0.853              |
| <i>P. undulatum</i> soil | L <sub>EL</sub>       | 0.2025          | 0.5216           | 0.388          | 0.698              |
| <i>Eucalyptus</i> soil   | L <sub>EL</sub>       | 0.0690          | 0.5521           | 0.125          | 0.901              |
| Filter-paper             | L <sub>PG</sub>       | -0.0690         | 0.3716           | -0.186         | 0.853              |
| <i>P. undulatum</i> soil | L <sub>PG</sub>       | 0.0690          | 0.5300           | 0.130          | 0.896              |
| <i>Eucalyptus</i> soil   | L <sub>PG</sub>       | 0.0690          | 0.5521           | 0.125          | 0.901              |
| Filter-paper             | L <sub>PL</sub>       | 0.0002          | 0.3651           | 0.017          | 0.986              |
| <i>P. undulatum</i> soil | L <sub>PL</sub>       | -0.0741         | 0.5307           | -0.140         | 0.889              |
| <i>Eucalyptus</i> soil   | L <sub>PL</sub>       | 0.0800          | 0.5418           | 0.148          | 0.883              |

**Table S4.** Summary of Generalized Linear Models for the time for the last germination ( $t_f$ , day) of *Eucalyptus ovata* seeds under different substrates (i.e., Filter-paper; *P. undulatum* soil; *Eucalyptus* soil) and different watering treatments (i.e., Water; L<sub>EL</sub> = Leachate of *Eucalyptus* spp. Litter; L<sub>PG</sub> = Leachate of *P. undulatum* Green leaves; L<sub>PL</sub> = Leachate of *P. undulatum* Litter). The formula of the model equation is  $glm(t_f \sim \text{Substrate} \times \text{Treatment}, \text{family} = \text{poisson}(\text{link} = "log"))$ , the intercept is Filter-paper Water, and the significance is calculated on the exponent and not on the  $t_f$ . All results with  $p < 0.05$  were considered significant.

| Substrate                | Watering treatment | Estimate | Std.Error | z value | Pr(> z ) |
|--------------------------|--------------------|----------|-----------|---------|----------|
| Filter-paper             | Water              | 2.6391   | 0.1543    | 17.103  | <0.001   |
| <i>P. undulatum</i> soil | Water              | -0.1823  | 0.2289    | -0.797  | 0.426    |
| <i>Eucalyptus</i> soil   | Water              | -0.2113  | 0.2307    | -0.916  | 0.360    |
| Filter-paper             | L <sub>EL</sub>    | 0.0235   | 0.2170    | 0.108   | 0.914    |
| <i>P. undulatum</i> soil | L <sub>EL</sub>    | 0.2713   | 0.3113    | 0.871   | 0.384    |
| <i>Eucalyptus</i> soil   | L <sub>EL</sub>    | 0.0610   | 0.3217    | 0.190   | 0.850    |
| Filter-paper             | L <sub>PG</sub>    | 0.1125   | 0.2123    | 0.530   | 0.596    |
| <i>P. undulatum</i> soil | L <sub>PG</sub>    | -0.1415  | 0.3210    | -0.441  | 0.659    |
| <i>Eucalyptus</i> soil   | L <sub>PG</sub>    | 0.0247   | 0.3165    | 0.078   | 0.938    |
| Filter-paper             | L <sub>PL</sub>    | 0.0690   | 0.2146    | 0.322   | 0.748    |
| <i>P. undulatum</i> soil | L <sub>PL</sub>    | 0.1133   | 0.3137    | 0.361   | 0.718    |
| <i>Eucalyptus</i> soil   | L <sub>PL</sub>    | 0.2548   | 0.3110    | 0.819   | 0.413    |

**Table S5.** Summary of Generalized Linear Models for the time spread of germination ( $t_f - t_0$ , day) of *Eucalyptus ovata* seeds under different substrates (i.e., Filter-paper; *P. undulatum* soil; *Eucalyptus* soil) and different watering treatments (i.e., Water; L<sub>EL</sub> = Leachate of *Eucalyptus* spp. Litter; L<sub>PG</sub> = Leachate of *P. undulatum* Green leaves; L<sub>PL</sub> = Leachate of *P. undulatum* Litter). The formula of the model equation is  $glm((t_f - t_0) \sim \text{Substrate} \times \text{Treatment}, \text{family} = \text{poisson}(\text{link} = "log"))$ , the intercept is Filter-paper Water, and the significance is calculated on the exponent and not on the  $t_f - t_0$ . All results with  $p < 0.05$  were considered significant.

| Substrate                | Watering treatment | Estimate | Std.Error | z value | Pr(> z ) |
|--------------------------|--------------------|----------|-----------|---------|----------|
| Filter-paper             | Water              | 2.1792   | 0.1925    | 11.417  | <0.001   |
| <i>P. undulatum</i> soil | Water              | -0.2513  | 0.2910    | -0.864  | 0.388    |
| <i>Eucalyptus</i> soil   | Water              | -0.2048  | 0.2872    | -0.713  | 0.476    |
| Filter-paper             | L <sub>EL</sub>    | 0.0715   | 0.2674    | 0.267   | 0.789    |
| <i>P. undulatum</i> soil | L <sub>EL</sub>    | 0.3180   | 0.3891    | 0.817   | 0.414    |
| <i>Eucalyptus</i> soil   | L <sub>EL</sub>    | 0.0564   | 0.3962    | 0.142   | 0.887    |
| Filter-paper             | L <sub>PG</sub>    | 0.2007   | 0.2595    | 0.773   | 0.439    |
| <i>P. undulatum</i> soil | L <sub>PG</sub>    | -0.2495  | 0.4062    | -0.614  | 0.539    |
| <i>Eucalyptus</i> soil   | L <sub>PG</sub>    | 0.0041   | 0.3871    | 0.011   | 0.991    |
| Filter-paper             | L <sub>PL</sub>    | 0.1054   | 0.2653    | 0.397   | 0.691    |
| <i>P. undulatum</i> soil | L <sub>PL</sub>    | 0.2174   | 0.3905    | 0.557   | 0.578    |
| <i>Eucalyptus</i> soil   | L <sub>PL</sub>    | 0.3299   | 0.3811    | 0.866   | 0.387    |

**Table S6.** Summary of Generalized Linear Models for the time for the first germination ( $t_0$ , day) of *Pittosporum undulatum* seeds under different substrates (*i.e.*, Filter-paper; *P. undulatum* soil; *Eucalyptus* soil) and different watering treatments (*i.e.*, Water; L<sub>EL</sub> = Leachate of *Eucalyptus* spp. Litter; L<sub>PG</sub> = Leachate of *P. undulatum* Green leaves; L<sub>PL</sub> = Leachate of *P. undulatum* Litter). The formula of the model equation is *glm* ( $t_0 \sim \text{Substrate} \times \text{Treatment}$ , *family* = *poisson* (*link* = "log")), the intercept is Filter-paper Water, and the significance is calculated on the exponent and not on the  $t_0$ . All results with  $p < 0.05$  were considered significant.

| Substrate                | Watering treatment | Estimate | Std.Error | z value | Pr(> z ) |
|--------------------------|--------------------|----------|-----------|---------|----------|
| Filter-paper             | Water              | 3.0600   | 0.1250    | 24.482  | <0.001   |
| <i>P. undulatum</i> soil | Water              | 0.0606   | 0.1742    | 0.348   | 0.728    |
| <i>Eucalyptus</i> soil   | Water              | -0.0645  | 0.1797    | -0.359  | 0.719    |
| Filter-paper             | L <sub>EL</sub>    | -0.0813  | 0.1805    | -0.451  | 0.652    |
| <i>P. undulatum</i> soil | L <sub>EL</sub>    | 0.0665   | 0.2494    | 0.267   | 0.790    |
| <i>Eucalyptus</i> soil   | L <sub>EL</sub>    | 0.0474   | 0.2578    | 0.184   | 0.854    |
| Filter-paper             | L <sub>PG</sub>    | 0.2478   | 0.1668    | 1.486   | 0.137    |
| <i>P. undulatum</i> soil | L <sub>PG</sub>    | -0.2478  | 0.2392    | -1.036  | 0.300    |
| <i>Eucalyptus</i> soil   | L <sub>PG</sub>    | -0.2478  | 0.2473    | -1.002  | 0.316    |
| Filter-paper             | L <sub>PL</sub>    | 0.2231   | 0.1677    | 1.331   | 0.183    |
| <i>P. undulatum</i> soil | L <sub>PL</sub>    | -0.2530  | 0.2408    | -1.051  | 0.293    |
| <i>Eucalyptus</i> soil   | L <sub>PL</sub>    | -0.1744  | 0.2463    | -0.708  | 0.479    |

**Table S7.** Summary of Generalized Linear Models for the time for the last germination ( $t_f$ , day) of *Pittosporum undulatum* seeds under different substrates (i.e., Filter-paper; *P. undulatum* soil; *Eucalyptus* soil) and different watering treatments (i.e., Water; L<sub>EL</sub> = Leachate of *Eucalyptus* spp. Litter; L<sub>PG</sub> = Leachate of *P. undulatum* Green leaves; L<sub>PL</sub> = Leachate of *P. undulatum* Litter). The formula of the model equation is *glm* ( $t_f \sim \text{Substrate} \times \text{Treatment}$ , family = poisson (link = "log")), the intercept is Filter-paper Water, and the significance is calculated on the exponent and not on the  $t_f$ . All results with  $p < 0.05$  were considered significant.

| Substrate                | Watering treatment | Estimate | Std.Error | z value | Pr(> z ) |
|--------------------------|--------------------|----------|-----------|---------|----------|
| Filter-paper             | Water              | 3.4340   | 0.1037    | 33.116  | <0.001   |
| <i>P. undulatum</i> soil | Water              | 0.0318   | 0.1455    | 0.218   | 0.827    |
| <i>Eucalyptus</i> soil   | Water              | 0.0318   | 0.1455    | 0.218   | 0.827    |
| Filter-paper             | L <sub>EL</sub>    | -0.0783  | 0.1496    | -0.523  | 0.601    |
| <i>P. undulatum</i> soil | L <sub>EL</sub>    | 0.0886   | 0.2076    | 0.427   | 0.670    |
| <i>Eucalyptus</i> soil   | L <sub>EL</sub>    | 0.0465   | 0.2087    | 0.223   | 0.824    |
| Filter-paper             | L <sub>PG</sub>    | 0.0625   | 0.1444    | 0.433   | 0.665    |
| <i>P. undulatum</i> soil | L <sub>PG</sub>    | -0.0419  | 0.2037    | -0.206  | 0.837    |
| <i>Eucalyptus</i> soil   | L <sub>PG</sub>    | -0.0836  | 0.2047    | -0.408  | 0.683    |
| Filter-paper             | L <sub>PL</sub>    | 0.0524   | 0.1447    | 0.362   | 0.718    |
| <i>P. undulatum</i> soil | L <sub>PL</sub>    | -0.0524  | 0.2044    | -0.256  | 0.798    |
| <i>Eucalyptus</i> soil   | L <sub>PL</sub>    | -0.0841  | 0.2053    | -0.410  | 0.682    |

**Table S8.** Summary of Generalized Linear Models for the time spread of germination ( $t_f - t_0$ , day) of *Pittosporum undulatum* seeds under different substrates (i.e., Filter-paper; *P. undulatum* soil; *Eucalyptus* soil) and different watering treatments (i.e., Water; L<sub>EL</sub> = Leachate of *Eucalyptus* spp. Litter; L<sub>PG</sub> = Leachate of *P. undulatum* Green leaves; L<sub>PL</sub> = Leachate of *P. undulatum* Litter). The formula of the model equation is  $glm((t_f - t_0) \sim \text{Substrate} \times \text{Treatment}, \text{family} = \text{poisson}(\text{link} = "log"))$ , the intercept is Filter-paper Water, and the significance is calculated on the exponent and not on the  $t_f - t_0$ . All results with  $p < 0.05$  were considered significant.

| Substrate                | Watering treatment | Estimate | Std.Error | z value | Pr(> z ) |
|--------------------------|--------------------|----------|-----------|---------|----------|
| Filter-paper             | Water              | 2.2687   | 0.1857    | 12.217  | <0.001   |
| <i>P. undulatum</i> soil | Water              | -0.0351  | 0.2650    | -0.132  | 0.895    |
| <i>Eucalyptus</i> soil   | Water              | 0.2162   | 0.2495    | 0.867   | 0.386    |
| Filter-paper             | L <sub>EL</sub>    | -0.0715  | 0.2674    | -0.267  | 0.789    |
| <i>P. undulatum</i> soil | L <sub>EL</sub>    | 0.1405   | 0.3749    | 0.375   | 0.708    |
| <i>Eucalyptus</i> soil   | L <sub>EL</sub>    | 0.0433   | 0.3576    | 0.121   | 0.904    |
| Filter-paper             | L <sub>PG</sub>    | -0.5341  | 0.3055    | -1.748  | 0.080    |
| <i>P. undulatum</i> soil | L <sub>PG</sub>    | 0.6031   | 0.4029    | 1.497   | 0.135    |
| <i>Eucalyptus</i> soil   | L <sub>PG</sub>    | 0.4769   | 0.3879    | 1.229   | 0.219    |
| Filter-paper             | L <sub>PL</sub>    | -0.4769  | 0.3001    | -1.589  | 0.112    |
| <i>P. undulatum</i> soil | L <sub>PL</sub>    | 0.5459   | 0.3989    | 1.369   | 0.171    |
| <i>Eucalyptus</i> soil   | L <sub>PL</sub>    | 0.2946   | 0.3888    | 0.758   | 0.449    |

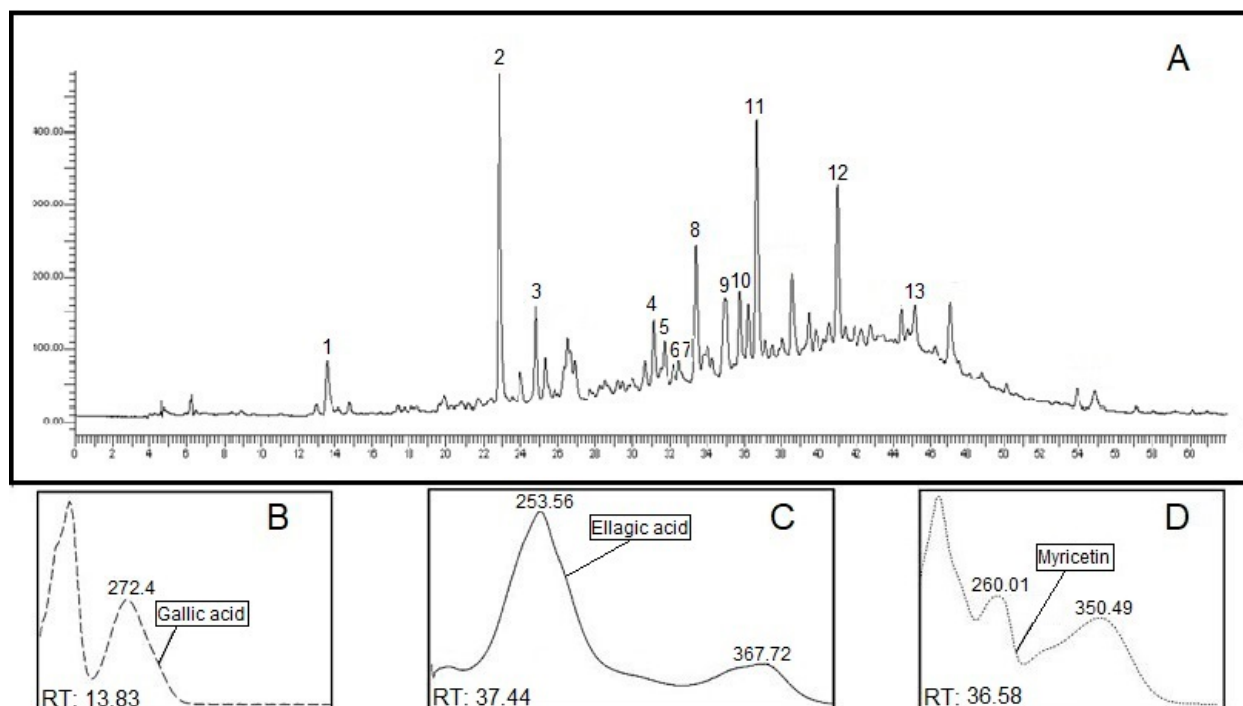

**Figure S3.** Representative HPLC-DAD chromatogram (at 280 nm) of ethanolic extracts of *Eucalyptus* green leaves. The numbers indicate the major peaks: 1, 2, 3 and 4) gallic acid derivatives, 5, 7, 8, 10, 11 and 12) myricetin derivatives, 6, 9 and 13) ellagic acid derivatives. B, C and D: UV spectra of authentic standards (gallic acid, ellagic acid and myricetin) reported with their Retention Time (RT).

**Table S9.** List of the compounds detected in ethanolic extracts of green leaves of *Eucalyptus* spp. The putative identification of the compounds was based on the comparison of UV spectra and RT with authentic standards. The peak numbers (n. peak) correspond to the numbers reported in the chromatogram (Figure S3A). Their RT and maximum wavelength ( $\lambda_{\max}$ ) are reported.

| n. peak | RT (min)         | $\lambda_{\max}$ (nm) | Putative identification |
|---------|------------------|-----------------------|-------------------------|
| 1       | 13.87 $\pm$ 0.03 | 272                   | Gallic acid derivative  |
| 2       | 22.90 $\pm$ 0.12 | 273                   | Gallic acid derivative  |
| 3       | 24.86 $\pm$ 0.12 | 273                   | Gallic acid derivative  |
| 4       | 22.69 $\pm$ 0.02 | 272                   | Gallic acid derivative  |
| 5       | 26.71 $\pm$ 0.03 | 263-354               | Myricetin derivative    |
| 6       | 31.13 $\pm$ 0.07 | 254-364               | Ellagic acid derivative |
| 7       | 31.72 $\pm$ 0.09 | 264-352               | Myricetin derivative    |
| 8       | 32.27 $\pm$ 0.13 | 261-354               | Myricetin derivative    |
| 9       | 32.55 $\pm$ 0.07 | 254-366               | Ellagic acid derivative |
| 10      | 33.45 $\pm$ 0.10 | 259-353               | Myricetin derivative    |
| 11      | 35.02 $\pm$ 0.11 | 259-350               | Myricetin derivative    |
| 12      | 36.67 $\pm$ 0.09 | 258-349               | Myricetin derivative    |
| 13      | 41.00 $\pm$ 0.08 | 253-364               | Ellagic acid derivative |

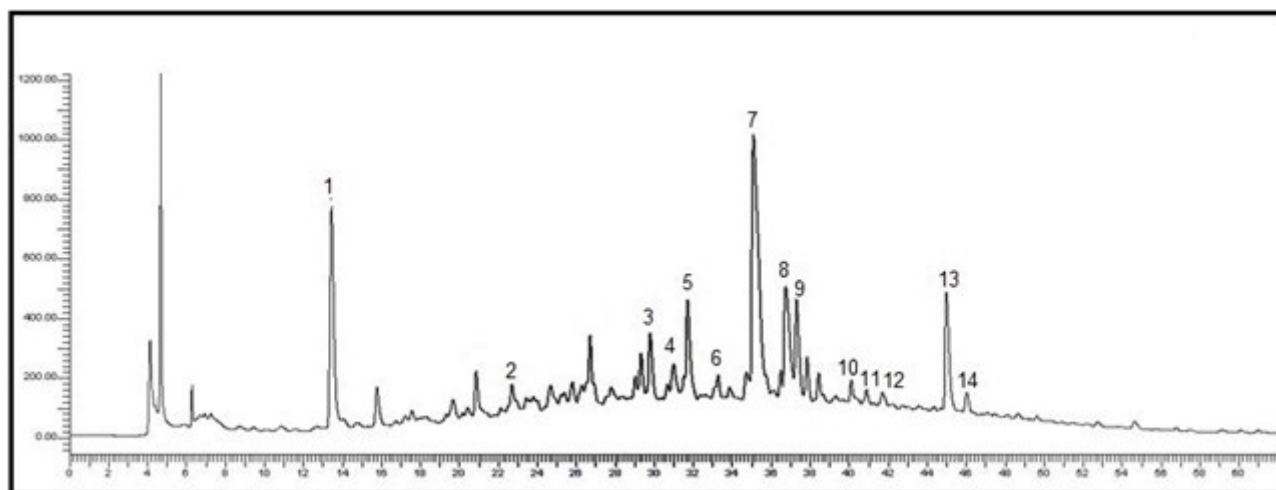

**Figure S4.** Representative HPLC-DAD chromatogram (at 280 nm) of ethanolic extract of *Eucalyptus* litter. The numbers indicate the major peaks: 1 and 2) gallic acid derivatives, 3, 4, 5, 7, 8, 10, 12, 13 and 14) ellagic acid derivatives, 6, 9 and 11) myricetin derivative.

**Table S10.** List of the compounds detected in ethanolic extracts of *Eucalyptus* spp. litter. The putative identification of the compounds was based on the comparison of UV spectra and RT with authentic standards. The peak numbers (n. peak) correspond to the numbers reported in the chromatogram (Figure S4). Their RT and maximum wavelength ( $\lambda_{\text{max}}$ ) are reported.

| n. peak | RT (min)         | $\lambda_{\text{max}}$ (nm) | Putative identification |
|---------|------------------|-----------------------------|-------------------------|
| 1       | 13.43 $\pm$ 0.03 | 272                         | Gallic acid derivative  |
| 2       | 22.69 $\pm$ 0.02 | 273                         | Gallic acid derivative  |
| 3       | 29.79 $\pm$ 0.03 | 253-363                     | Ellagic acid derivative |
| 4       | 31.00 $\pm$ 0.03 | 255-368                     | Ellagic acid derivative |
| 5       | 31.70 $\pm$ 0.02 | 251-367                     | Ellagic acid derivative |
| 6       | 33.43 $\pm$ 0.3  | 259-358                     | Myricetin derivative    |
| 7       | 35.07 $\pm$ 0.02 | 251-366                     | Ellagic acid derivative |
| 8       | 36.73 $\pm$ 0.04 | 252-368                     | Ellagic acid derivative |
| 9       | 37.30 $\pm$ 0.02 | 260-355                     | Myricetin derivative    |
| 11      | 40.09 $\pm$ 0.02 | 250-366                     | Ellagic acid derivative |
| 11      | 40.87 $\pm$ 0.02 | 260-356                     | Myricetin derivative    |
| 12      | 41.69 $\pm$ 0.02 | 251-367                     | Ellagic acid derivative |
| 13      | 44.97 $\pm$ 0.04 | 252-369                     | Ellagic acid derivative |
| 14      | 46.01 $\pm$ 0.02 | 251-369                     | Ellagic acid derivative |

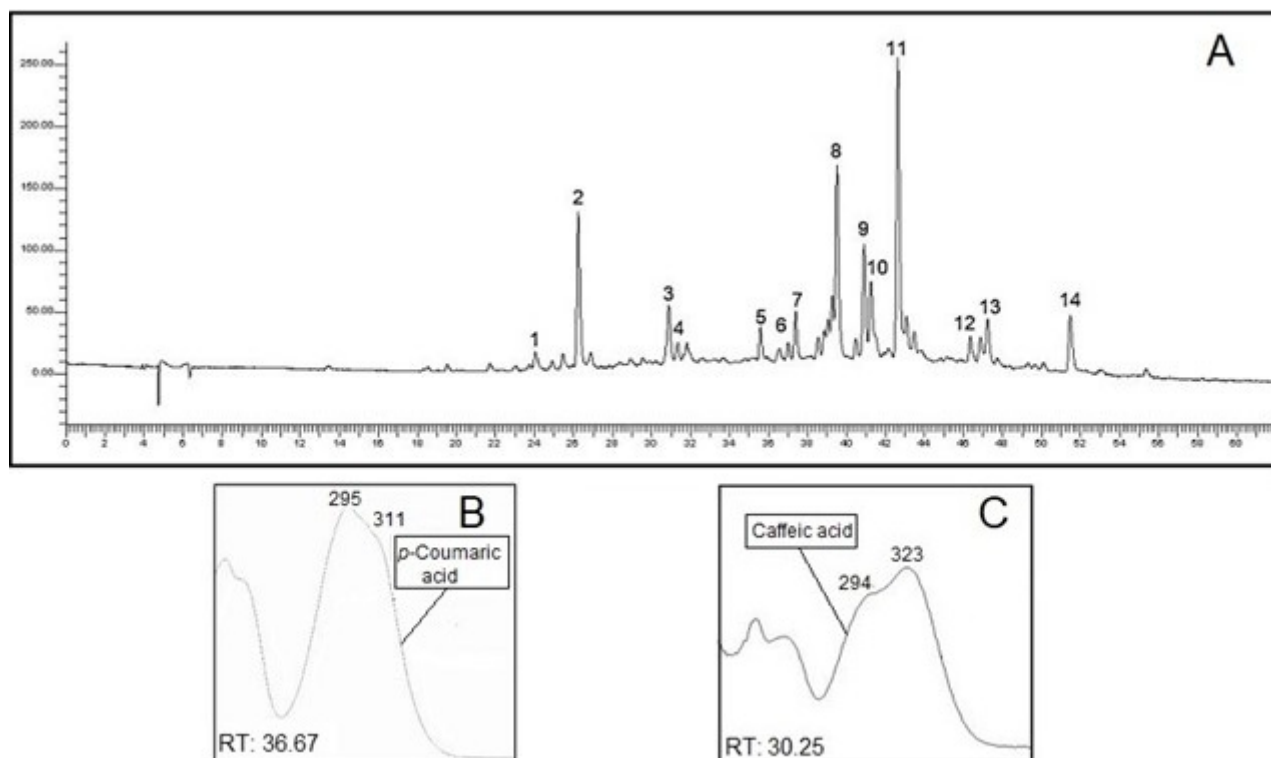

**Figure S5.** Representative HPLC-DAD chromatogram (at 330 nm) of ethanolic extracts of *Pittosporum undulatum* green leaves. The numbers indicate the major peaks: 1, 2, 4, 8, 9, 10, 11, 12, 13 and 14) caffeic acid derivatives, 3) *p*-coumaric acid derivative, 5, 6 and 7) myricetin derivatives. B, C: UV spectra of authentic standards (*p*-coumaric and caffeic acid) reported with relative Retention Time (RT).

**Table S11.** List of the compounds detected in ethanolic extracts of green leaves of *Pittosporum undulatum*. The putative identification of the compounds was based on the comparison of UV spectra and RT with authentic standards. The peak numbers (n. peak) correspond to the numbers reported in the chromatogram (Figure S5A). Their RT and maximum wavelength ( $\lambda_{\max}$ ) are reported.

| n. peak | RT (min)         | $\lambda_{\max}$ (nm) | Putative identification            |
|---------|------------------|-----------------------|------------------------------------|
| 1       | 23.60 $\pm$ 0.88 | 296-324               | Caffeic acid derivative            |
| 2       | 25.72 $\pm$ 1.02 | 297-323               | Caffeic acid derivative            |
| 3       | 30.16 $\pm$ 1.28 | 295-312               | <i>p</i> -Coumaric acid derivative |
| 4       | 30.70 $\pm$ 1.16 | 295-323               | Caffeic acid derivative            |
| 5       | 35.76 $\pm$ 0.06 | 259-352               | Myricetin derivative               |
| 6       | 37.53 $\pm$ 0.01 | 258-353               | Myricetin derivative               |
| 7       | 39.42 $\pm$ 0.03 | 258-352               | Myricetin derivative               |
| 8       | 38.71 $\pm$ 1.41 | 297-325               | Caffeic acid derivative            |
| 9       | 40.09 $\pm$ 1.42 | 297-324               | Caffeic acid derivative            |
| 10      | 40.44 $\pm$ 1.42 | 296-324               | Caffeic acid derivative            |
| 11      | 41.84 $\pm$ 1.38 | 296-325               | Caffeic acid derivative            |
| 12      | 45.82 $\pm$ 0.90 | 297-324               | Caffeic acid derivative            |
| 13      | 46.37 $\pm$ 0.84 | 298-323               | Caffeic acid derivative            |
| 14      | 51.31 $\pm$ 0.32 | 297-321               | Caffeic acid derivative            |

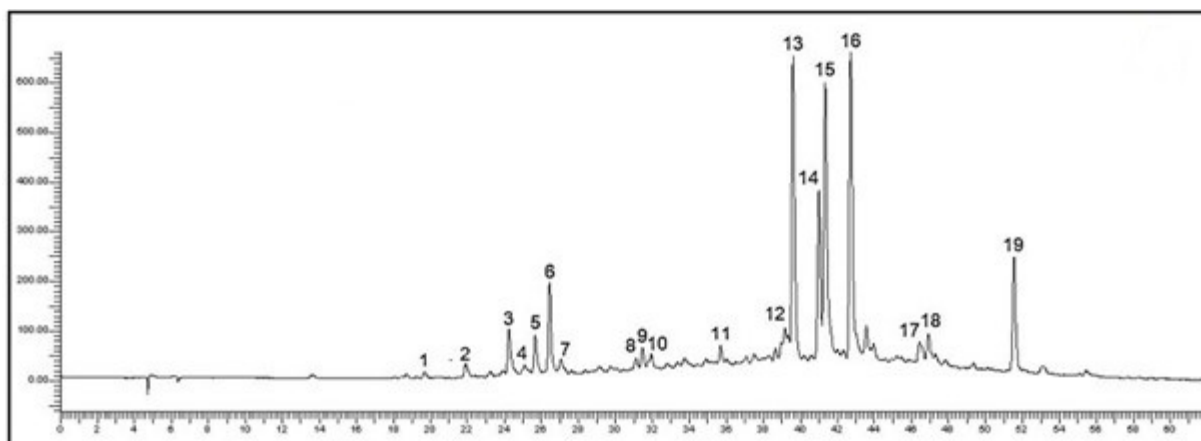

**Figure S6.** Representative HPLC-DAD chromatogram (at 330 nm) of ethanolic extracts of *Pittosporum undulatum* litter. The numbers indicate the major peaks: 1, 2, 3, 4, 5, 6, 7, 9, 10, 13, 14, 15, 16, 17, 18 and 19) caffeic acid derivatives, 8) *p*-coumaric acid derivative, 11 and 12) myricetin derivatives.

**Table S12.** List of the compounds detected in ethanolic extracts of litter of *Pittosporum undulatum*. The putative identification of the compounds was based on the comparison of UV spectra and RT with authentic standards. The peak numbers (n. peak) correspond to the numbers reported in the chromatogram (Figure S6). Their RT and maximum wavelength ( $\lambda_{\text{max}}$ ) are reported.

| n. peak | RT (min)         | $\lambda_{\text{max}}$ (nm) | Putative identification            |
|---------|------------------|-----------------------------|------------------------------------|
| 1       | 19.77 $\pm$ 0.03 | 296-325                     | Caffeic acid derivative            |
| 2       | 21.86 $\pm$ 0.04 | 294-324                     | Caffeic acid derivative            |
| 3       | 24.21 $\pm$ 0.03 | 297-324                     | Caffeic acid derivative            |
| 4       | 25.07 $\pm$ 0.03 | 294-326                     | Caffeic acid derivative            |
| 5       | 25.63 $\pm$ 0.04 | 295-325                     | Caffeic acid derivative            |
| 6       | 26.39 $\pm$ 0.04 | 297-323                     | Caffeic acid derivative            |
| 7       | 27.02 $\pm$ 0.04 | 297-325                     | Caffeic acid derivative            |
| 8       | 31.06 $\pm$ 0.05 | 292-313                     | <i>p</i> -Coumaric acid derivative |
| 9       | 31.40 $\pm$ 0.04 | 296-324                     | Caffeic acid derivative            |
| 10      | 31.89 $\pm$ 0.04 | 295-325                     | Caffeic acid derivative            |
| 11      | 35.77 $\pm$ 0.03 | 259-350                     | Myricetin derivative               |
| 12      | 39.24 $\pm$ 0.02 | 259-350                     | Myricetin derivative               |
| 13      | 39.54 $\pm$ 0.05 | 297-325                     | Caffeic acid derivative            |
| 14      | 40.93 $\pm$ 0.05 | 296-327                     | Caffeic acid derivative            |
| 15      | 41.28 $\pm$ 0.05 | 298-326                     | Caffeic acid derivative            |
| 16      | 42.66 $\pm$ 0.05 | 298-326                     | Caffeic acid derivative            |
| 17      | 46.42 $\pm$ 0.08 | 297-325                     | Caffeic acid derivative            |
| 18      | 46.85 $\pm$ 0.05 | 296-323                     | Caffeic acid derivative            |
| 19      | 51.48 $\pm$ 0.05 | 298-326                     | Caffeic acid derivative            |

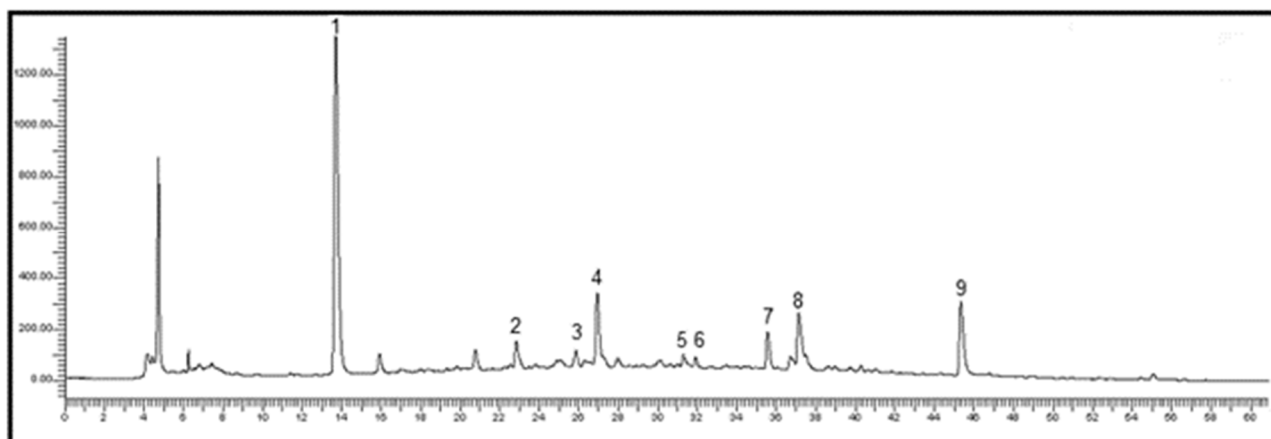

**Figure S7.** Representative HPLC-DAD chromatogram (at 280 nm) of aqueous extracts of *Eucalyptus* litter. The numbers indicate the major peaks: 1, 2 and 4) gallic acid derivatives, 3, 5, 6, 7, 8 and 9) ellagic acid derivatives.

**Table S13.** List of the compounds detected in aqueous extracts of litter of *Eucalyptus* spp. The putative identification of the compounds was based on the comparison of UV spectra and RT with authentic standards. The peak numbers (n. peak) correspond to the numbers reported in the chromatogram (Figure S7). Their RT and maximum wavelength ( $\lambda_{\text{max}}$ ) are reported.

| n. peak | RT (min)         | $\lambda_{\text{max}}$ (nm) | Putative identification |
|---------|------------------|-----------------------------|-------------------------|
| 1       | 13.78 $\pm$ 0.08 | 272                         | Gallic acid derivative  |
| 2       | 22.99 $\pm$ 0.02 | 273                         | Gallic acid derivative  |
| 3       | 25.98 $\pm$ 0.03 | 258-369                     | Ellagic acid derivative |
| 4       | 27.08 $\pm$ 0.02 | 273                         | Gallic acid derivative  |
| 5       | 31.43 $\pm$ 0.07 | 258-369                     | Ellagic acid derivative |
| 6       | 31.88 $\pm$ 0.04 | 258-369                     | Ellagic acid derivative |
| 7       | 35.66 $\pm$ 0.04 | 258-368                     | Ellagic acid derivative |
| 8       | 37.23 $\pm$ 0.05 | 258-369                     | Ellagic acid derivative |
| 9       | 45.42 $\pm$ 0.04 | 258-368                     | Ellagic acid derivative |

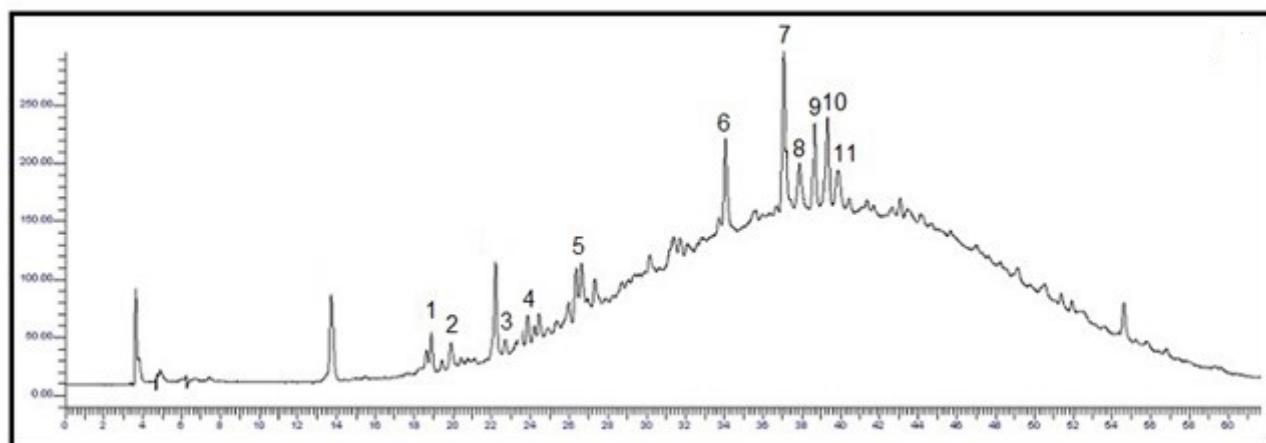

**Figure S8.** Representative HPLC-DAD chromatogram (at 330 nm) of aqueous extracts of *P. undulatum*. The numbers indicate the major peaks: 1,2, 3, 4, 5, 8, 9, 10 and 11) caffeic acid derivatives, 6) myricetin derivatives, 7) *p*-coumaric acid derivative.

**Table S14.** List of the compounds detected in aqueous extracts of litter of *P. undulatum*. The putative identification of the compounds was based on the comparison of UV spectra and RT with authentic standards. The peak numbers (n. peak) correspond to the numbers reported in the chromatogram (Figure S8). Their RT and maximum wavelength ( $\lambda_{\text{max}}$ ) are reported.

| n. peak | RT (min)         | $\lambda_{\text{max}}$ (nm) | Putative identification            |
|---------|------------------|-----------------------------|------------------------------------|
| 1       | 18.61 $\pm$ 0.02 | 291-319                     | Caffeic acid derivative            |
| 2       | 19.93 $\pm$ 0.02 | 294-323                     | Caffeic acid derivative            |
| 3       | 22.67 $\pm$ 0.05 | 290-319                     | Caffeic acid derivative            |
| 4       | 23.89 $\pm$ 0.04 | 290-321                     | Caffeic acid derivative            |
| 5       | 26.42 $\pm$ 0.02 | 290-318                     | Caffeic acid derivative            |
| 6       | 34.04 $\pm$ 0.05 | 262-352                     | Myricetin derivative               |
| 7       | 37.10 $\pm$ 0.04 | 293-312                     | <i>p</i> -Coumaric acid derivative |
| 8       | 37.89 $\pm$ 0.02 | 292-325                     | Caffeic acid derivative            |
| 9       | 38.68 $\pm$ 0.03 | 294-321                     | Caffeic acid derivative            |
| 10      | 39.33 $\pm$ 0.02 | 290-321                     | Caffeic acid derivative            |
| 11      | 39.85 $\pm$ 0.02 | 293-323                     | Caffeic acid derivative            |
